# Supplementary material for: Theoretical study of the impact of dilute nanoparticle additives on the shear elasticity of dense colloidal suspensions
Source: Royal Society of Chemistry journal article supplement (doi:10.1039/d4sm01193g), 2025-01-01
Supplement: d4sm01193g1.pdf [file d4sm01193g1.pdf]

**Supplementary Information: Theoretical Study of the Impact of Dilute Nanoparticle  
Additives on the Elasticity of Dense Colloidal Suspensions**

Subhasish Chaki<sup>1,4,5</sup>, Benito Román-Manso<sup>6</sup>, Larissa Senatus<sup>6</sup>, Jennifer A. Lewis<sup>6</sup>, and  
Kenneth S. Schweizer<sup>1-4</sup>

<sup>1</sup>Departments of Materials Science, <sup>2</sup>Chemistry, and <sup>3</sup>Chemical & Biomolecular Engineering,

<sup>4</sup>Materials Research Laboratory, University of Illinois, Urbana IL 61801 USA

<sup>5</sup> Institut für Theoretische Physik II–Soft Matter, Heinrich-Heine-Universität, Düsseldorf  
40225, Germany

<sup>6</sup> School of Engineering and Applied Sciences, Harvard University, Cambridge, Massachusetts  
02138, United States

The figures below are all referred to and discussed in the main text. They provide additional results of interest, and also buttress some broader scientific statements and conclusions made in the main text. In all the theoretical plots below, the black square open symbols represent results for the reference one-component hard sphere system.

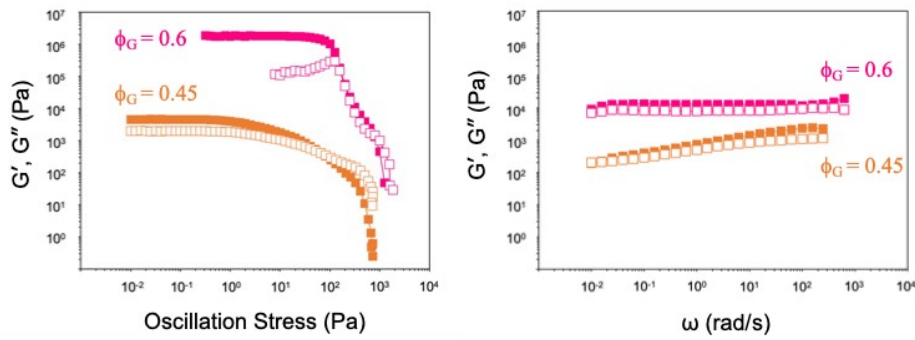

**Figure S1:** Log-log plots of the measured shear elastic ( $G'$ ) and loss ( $G''$ ) moduli as a function of shear stress (left) and frequency ( $\omega$ ) (right) for granular-nanoparticle mixtures of varying granular particle packing fraction at a constant nanoparticle loading of 1.5% by volume.

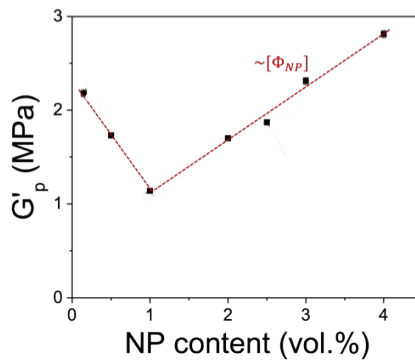

**Figure S2:** Measured shear elastic modulus ( $G'$ ) as a function of nanoparticle loading for granular-nanoparticle mixtures with a constant granular particle packing fraction of  $\phi_G = 0.6$ .

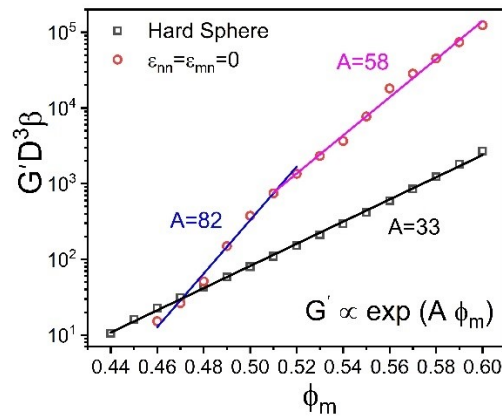

**Figure S3:** Log-linear plot of the nondimensionalized elastic shear modulus as a function of colloid packing fraction  $\phi_m$  for fixed nanoparticle packing fraction  $\phi_n = 0.025$  and size ratio  $D/d=10$ . All the interactions between different species are purely hard-core repulsion.

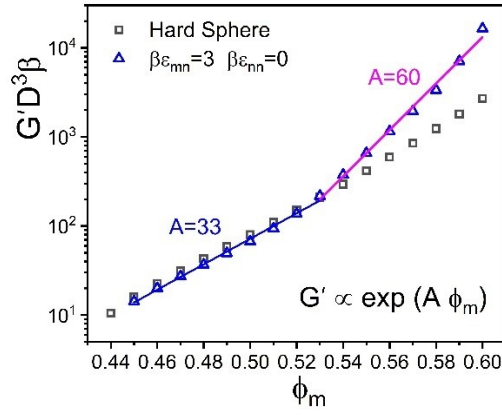

**Figure S4:** Log-linear plot of the nondimensionalized elastic shear modulus as a function of colloid packing fraction  $\phi_m$  with interfacial attraction between colloids and nanoparticles of contact strength  $3k_B T$  and range  $0.002D$ . The NP packing fraction is  $\phi_n = 0.025$ , and the size ratio  $D/d=10$ . The other interactions between colloid-colloid and NP-NP are purely hard-core repulsion.

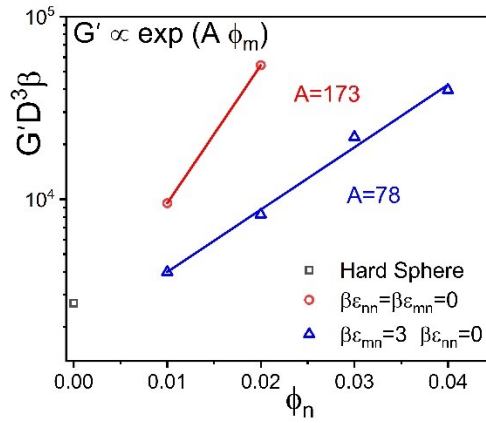

**Figure S5:** Log-linear plot of the nondimensionalized elastic shear modulus as a function of nanoparticle packing fraction  $\phi_n$  for a mixture with an interfacial attraction between colloids and nanoparticles of contact strength  $3k_B T$  and range  $0.002D$ , colloid packing fraction  $\phi_m = 0.6$ , and size ratio  $D/d=10$ . The colloid-colloid and NP-NP are purely hard-core repulsion.

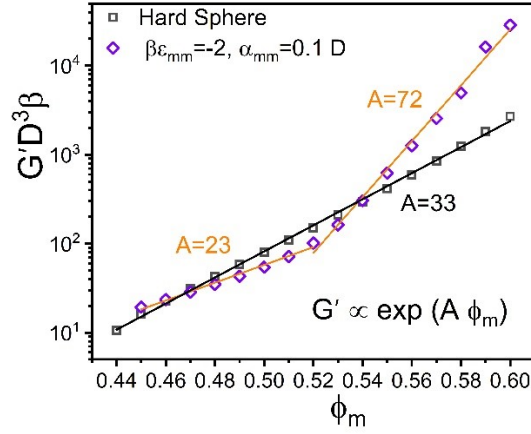

**Figure S6:** Log-linear plot of the nondimensionalized elastic shear modulus as a function of colloid packing fraction  $\phi_m$  of a mixture with direct repulsions between colloids of strength  $-2k_B T$  and range  $0.1D$ , NP packing fraction  $\phi_n = 0.025$ , and size ratio  $D/d=10$ . The other interactions between colloid-NP and NP-NP are purely hard-core repulsion. .

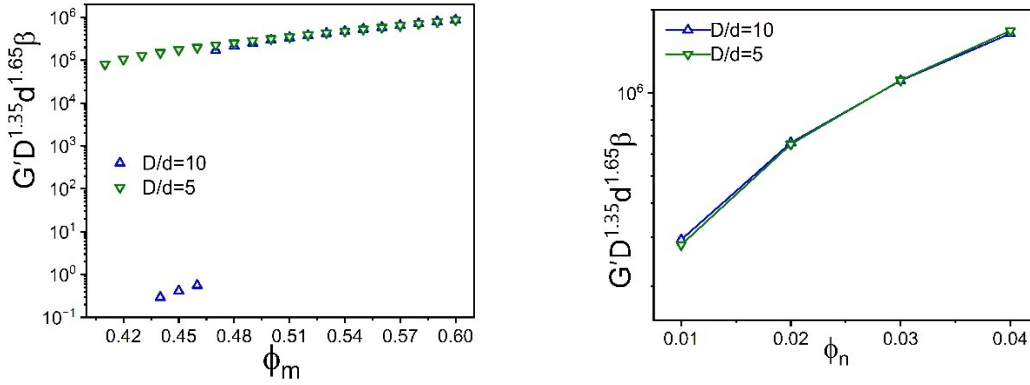

**Figure S7:** Log-linear plot of the dimensionless elastic shear modulus scaled by the mixed volumetric factor of  $D^{1.35}d^{1.65}$  as a function of (a) colloid packing fraction at fixed NP packing fraction  $0.025$ , and (b) nanoparticle volume fraction at fixed colloid packing fraction  $0.60$ , for the colloid-NP interfacial attraction of strength  $4k_B T$  and range  $0.002D$  mixture. An excellent collapse is obtained.

## Theoretical Calculation of the Shear Modulus of Binary Mixtures

The time-dependent shear modulus is given by the following well known exact expression [1]

$$G(t) \equiv \frac{1}{k_B T V} \langle \sigma^{xy} e^{\Omega t} \sigma^{xy} \rangle \quad (1)$$

where  $\sigma^{xy}$  is the microscopic stress tensor, and  $e^{\Omega t}$  is the time evolution operator. Neglecting hydrodynamic interactions and using a simplified notation

$$\sigma^{xy} = \frac{1}{2} \sum_{\substack{i,j \rightarrow 1 \\ i \neq j}}^{N^{total}} R_{ij}^x \frac{\partial U_{ij}(R_{ij})}{\partial R_{ij}^y} \quad (2),$$

where the sum is over all particle pairs in the mixture that interact via the pair potential  $U_{ij}(r)$  and  $R_{ij}^x$  is the  $x$  component of the displacement vector between particles  $i$  and  $j$ . A collective bilinear projection operator associated with density fluctuations is then defined as [1]

$$\tilde{P}_3 \equiv \frac{1}{2} \frac{V}{(2\pi)^3} \int dk \sum_{\alpha,\beta,\gamma,\delta}^E \langle \dots A^\beta(k) A^\alpha(-k) \rangle \times S_{\alpha\delta}^{(-1)}(k) S_{\beta\gamma}^{(-1)}(-k) A^\delta(k) A^\gamma(-k) \quad (3).$$

where  $A^\alpha(k) \equiv (N_\alpha^{total})^{-1/2} \sum_{l=1}^{N_\alpha^{total}} e^{-ik \cdot R_j} - \sqrt{N_\alpha^{total}} (2\pi)^3 V^{-1} \delta(k)$  and  $k = 1, 2, \dots, E$ . Eqn

(1) is then approximated by projection of stress onto the density fluctuation variable:

$$\Delta\eta(t) \cong \frac{1}{k_B T V} \langle \tilde{P}_3 \sigma^{xy} e^{\Omega t} \tilde{P}_3 \sigma^{xy} \rangle \quad (4)$$

Well-known algebraic manipulations then yield [1]

$$\Delta\eta(t) = \frac{1}{2k_B T} \frac{1}{(2\pi)^3} \int dk \sum_{\alpha,\beta,\gamma,\delta}^E \sum_{\alpha',\beta',\gamma',\delta'}^E U_{\alpha\beta}(k) U_{\alpha'\beta'}(k) \times S_{\alpha\delta}^{-1}(k) S_{\alpha'\delta'}^{-1}(k) S_{\beta\gamma}^{-1}(k) S_{\beta'\gamma'}^{-1}(k) S_{\gamma\delta}(k,t) S_{\gamma'\delta'}(k,t) \quad (5)$$

$$\text{where} \quad U_{\alpha\beta}(k) \equiv \langle \sigma^{xy} A^\alpha(k) A^\beta(-k) \rangle \quad (6)$$

Integrating by parts allows Eq. (6) to be expressed as

$$U_{\alpha\beta}(k) = k_B T \frac{1}{2} \sum_{\substack{i,j \rightarrow 1 \\ i \neq j}}^{N^{total}} \left\langle \frac{\partial}{\partial R_{ij}^y} R_{ij}^x A^\alpha(k) A^\beta(-k) \right\rangle \quad (7)$$

From Eq. (7) one obtains:

$$U_{\alpha\beta}(k) = k_B T \frac{k_x k_y d}{k} S_{\alpha\beta}(k) \quad (8)$$

Substituting Eq. (8) into Eq. (5), and using Eqn (A2) of the Appendix of the main text, one obtains the key Eq.(7) of the main text for the dynamical elastic shear modulus in the long time limit  $t \rightarrow \infty$ .

## References

- [1] G. Nägele and J. Bergenholtz, J. Chem. Phys., 1998, **108**, 9893.
